# Supplementary material for: Exploration of the Fluorescent Properties and the Modulated Activities against Sirtuin Fluorogenic Assays of Chromenone-Derived Natural Products
Source: PubMed Central journal article supplement (PMC6100537; doi:10.3390/molecules23051063), 2018-05-02

# Exploration of the fluorescent properties and the modulated activities against sirtuin fluorogenic assays of chromenone-derived natural products

Hui Wen<sup>1,†</sup>, Nina Xue<sup>1,†</sup>, Feng Wu<sup>2</sup>, Yujun He<sup>1</sup>, Gang Zhang<sup>1</sup>, Zebin Hu<sup>3,\*</sup>, and Huaqing Cui<sup>1,\*</sup>

<sup>1</sup> State Key Laboratory of Bioactive Substances and Function of Natural Medicine, Institute of Materia Medica, Peking Union Medical College and Chinese Academy of Medical Sciences, Beijing 100050, China; wenhui@imm.ac.cn; angelnina@imm.ac.cn; heyujun506@imm.ac.cn; gzhang@imm.ac.cn

<sup>2</sup> Institute of Aviation Medicine, Air Force, Beijing, 100142, China; wufeng879@126.com

<sup>3</sup> National Institutes for Food and Drug Control, Beijing, 100050, China.

\* Correspondence: H.C.: hcui@imm.ac.cn; Tel.: +86-10-63037952; Z.H.: huzbcmba@163.com; Tel.: +86-10-67095597;

† These authors contributed equally to this paper.

### AMC

The excitation and emission fluorescence spectra of AMC: We set the  $E_m = 450 \text{ nm}$  to obtain the excitation fluorescence spectra (left), we set the  $E_x = 350 \text{ nm}$  to obtain the emission fluorescence spectra (right).

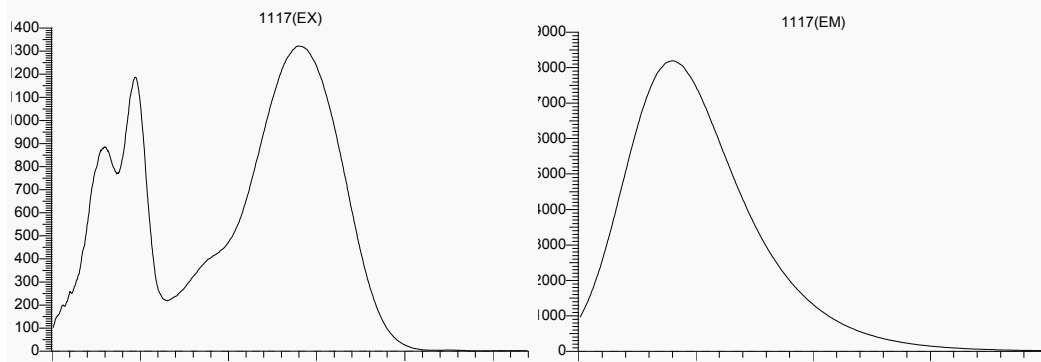

### Resveratrol

The excitation and emission fluorescence spectra of Resveratrol: We set the  $E_m = 400 \text{ nm}$  to obtain the excitation fluorescence spectra (left), we set the  $E_x = 304 \text{ nm}$  to obtain the emission fluorescence spectra (right).

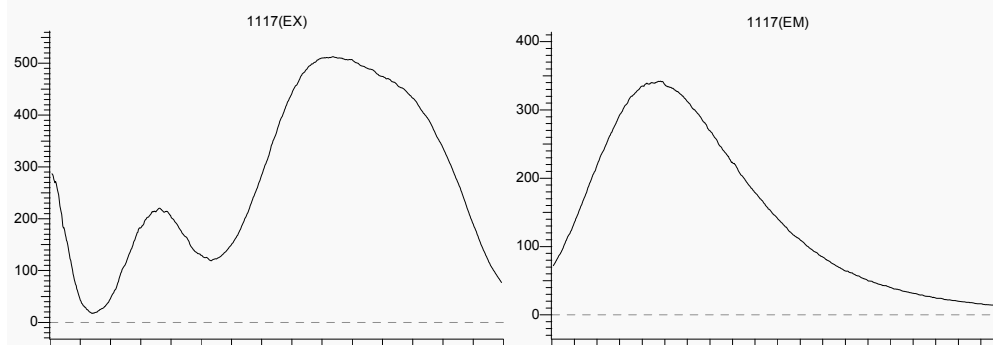

### Daidzein

The excitation and emission fluorescence spectra of Daidzein: We set the  $E_m = 490 \text{ nm}$  to obtain the excitation fluorescence spectra (left), we set the  $E_x = 340 \text{ nm}$  to obtain the emission fluorescence spectra (right).

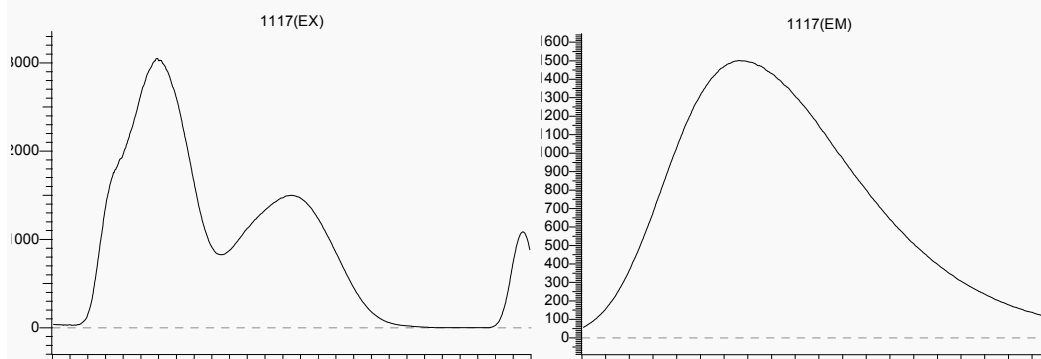

### Glycitein

The excitation and emission fluorescence spectra of Glycitein: We set the  $E_m = 490 \text{ nm}$  to obtain the excitation fluorescence spectra (left), we set the  $E_x = 340 \text{ nm}$  to obtain the emission fluorescence spectra (right).

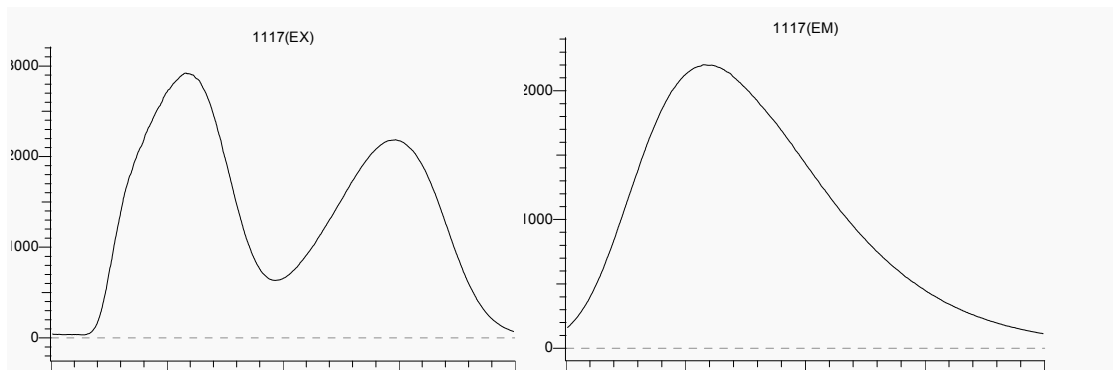

*Formononetin*

*The excitation and emission fluorescence spectra of Formononetin: We set the  $E_m = 488$  nm to obtain the excitation fluorescence spectra (left), we set the  $E_x = 338$  nm to obtain the emission fluorescence spectra (right).*

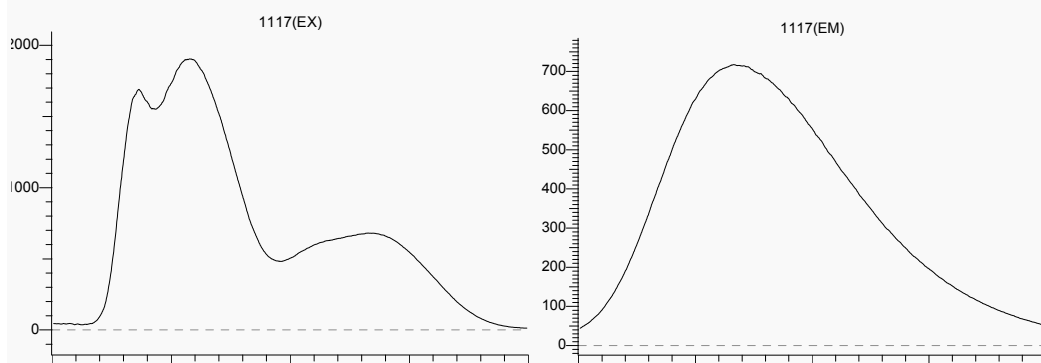

*Calycosin*

*The excitation and emission fluorescence spectra of Calycosin: We set the  $E_m = 478$  nm to obtain the excitation fluorescence spectra (left), we set the  $E_x = 348$  nm to obtain the emission fluorescence spectra (right).*

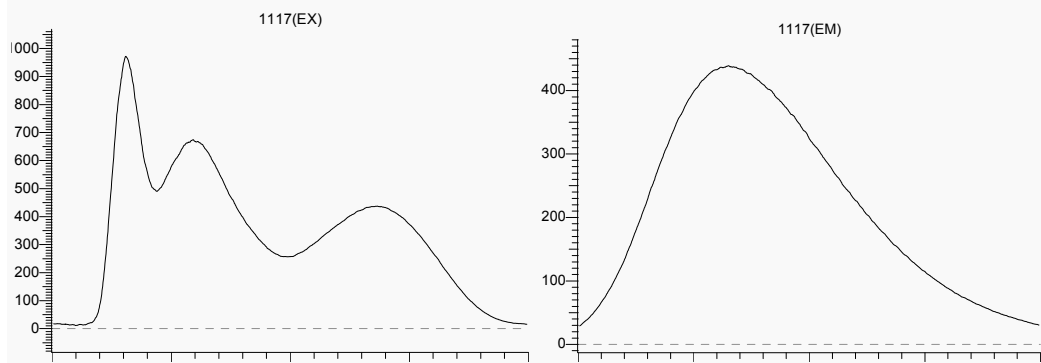

Supplement: molecules-23-01063-s001.pdf [file molecules-23-01063-s001.pdf]
